# Supplementary material for: Revealing Relationships Among Cognitive Functions Using Functional Connectivity and a Large-Scale Meta-Analysis Database
Source: Front Hum Neurosci. 2020 Jan 10;13:457. doi: 10.3389/fnhum.2019.00457 (PMC6965330; doi:10.3389/fnhum.2019.00457)
Supplement: Supplementary file 1 [file Table_1.XLSX]

## Sheet: AllConcepts_140818_kura140922
Supplementary Table 1: All cognitive terms.
Concept Name
abductive reasoning
absolute threshold
abstract analogy
abstract knowledge
acoustic coding
acoustic encoding
acoustic phonetic processing
acoustic processing
action
action initiation
action perception
action selection
activation
activation level
active maintenance
active recall
active retrieval
acuity
adaptation
adaptive control
addiction
affect perception
affect recognition
agency
agreeableness
altruism
altruistic motivation
alveolar
amodal representation
analog representation
analogical encoding
analogical inference
analogical problem solving
analogical reasoning
analogical transfer
analogy
anchoring
anhedonia
animacy perception
anomaly detection
anticipation
antisocial personality
anxiety
apparent motion
apperception
appetite
appetitive motivation
arousal
articulation
articulatory loop
articulatory planning
articulatory rehearsal
assimilation
association
association learning
attachment
attended channel
attended stimulus
attention
attention capacity
attention shift
attention shifting
attention span
attentional bias
attentional blink
attentional effort
attentional focusing
attentional resources
attentional state
attitude
audiovisual perception
audition
auditory attention
auditory coding
auditory encoding
auditory feedback
auditory grouping
auditory imagery
auditory learning
auditory lexical access
auditory localization
auditory masking
auditory memory
auditory perception
auditory scene
auditory scene analysis
auditory sentence comprehension
auditory stream segregation
auditory word comprehension
auditory word recognition
auditory working memory
autobiographical memory
autobiographical recall
automaticity
autonoesis
availability heuristic
aversive learning
awareness
backward chaining
Balance
behavioral inhibition
behavioral inhibition (cognitive)
behavioral inhibition (temperament)
belief
binocular convergence
binocular depth cue
binocular disparity
binocular rivalry
binocular vision
bitterness
blindsight
body orientation
body representation
border ownership
capacity limitation
case based reasoning
categorical clustering
categorical knowledge
categorical perception
categorization
category based induction
category learning
causal inference
central attention
central coherence
central executive
centration
change blindness
chemonociception
choice
chromatic contrast
chunk
chunking
circadian rhythm
cognition
cognitive control
cognitive development
cognitive dissonance
cognitive effort
cognitive heuristic
cognitive load
cognitive map
cognitive training
color constancy
color perception
communication
competition
comprehension
concept
concept learning
conceptual category
conceptual coherence
conceptual metaphor
conceptual planning
conceptual skill
conceptualization
conditional reasoning
conduct disorder
cone of confusion
Conflict adaptation effect
conflict detection
conjunction search
connotation
consciousness
consolidation
constancy
constituent structure
context
context dependent
context memory
contextual knowledge
contingency learning
contrastive stress
conventionality
convergent thinking
conversation
conversational skill
conversational speech
conversational structure
coordination
coproduction
coreference
covert attention
creative cognition
creative problem solving
creative thinking
critical period
crossmodal
crosstalk
crowding
crystallized intelligence
cue dependent forgetting
cue validity
cueing
curiosity
dative shift
decay of activation
deception
decision
decision making
declarative knowledge
declarative memory
declarative rule
deductive inference
deductive reasoning
deep processing
deep structure
default mode network
defensive aggression
defiance
deliberation
delusion
depth cue
depth perception
desire
difference threshold
diphthong
discourse
discourse comprehension
discourse knowledge
discourse planning
discourse processing
discourse production
dispositions
distraction
distributed coding
divergent thinking
divided attention
domain specificity
dream
eating
echoic memory
echolocation
edge detection
efficiency
effort
effort valuation
effortful processing
egocentric
elaborative processing
elaborative rehearsal
embodied cognition
emotion
emotion perception
emotion recognition
emotion regulation
emotional bonding
emotional decision making
emotional expression
emotional intelligence
emotional memory
emotional mimicry
emotional suppression
empathy
encoding
episodic buffer
episodic learning
episodic memory
error detection
error signal
error trapping
excitation
executive control
executive function
expectancy
expertise
explicit knowledge
explicit learning
explicit memory
externalizing
extinction
extrinsic motivation
face perception
face recognition
facial expression
false memory
familiarity
fatigue
fear
feature detection
feature extraction
feature integration
feature search
feedback
figure ground reversal
figure ground segregation
filtering
fixation
fixed action patterns
fluid intelligence
focus
focused attention
forgetting
form perception
framing
frustration
functional fixedness
gaze
generalization
generic knowledge
gestalt
Gestalt grouping
global precedence
goal
goal formation
goal maintenance
goal management
goal state
grammatical encoding
grapheme
graphemic buffer
grief
guilt
gustation
gustatory learning
gustatory memory
gustatory perception
habit
habit learning
habit memory
hallucination
happiness
hedonism
heuristic search
hill climbing
humiliation
humor
hyperactivity
iconic memory
illocutionary force
imageability
imagery
imagination
implicit knowledge
implicit memory
imprinting
impulsivity
Inappropriate speech
inattention
inattentional blindness
incidental learning
incubation
indignation
induction
inductive reasoning
inference
inhibition
inhibition of return
insight
instinct
instrumental conditioning
instrumental learning
integration
intelligence
intention
intentional forgetting
intentional learning
intentionality
interference
interference resolution
intermediate term memory
internal speech
internalizing
interoception
interoceptive representation
interrogative
intonation
intrinsic motivation
introspection
involuntary attention
irony
irritability
joint attention
judgment
kinaesthetic representation
kinesthesia
knowledge
language
language acquisition
language comprehension
language learning
language processing
language production
lateral masking
learning
lemma
lethargy
lexeme
lexical access
lexical ambiguity
lexical encoding
lexical processing
lexical retrieval
lexicon
life satisfaction
linguistic competence
listening
Locomotion
logic
logical reasoning
loneliness
long term memory
loss
loss aversion
lying
maintenance
manipulation
mathematical reasoning
meaning
mechanical reasoning
melody
memory
memory acquisition
memory consolidation
memory decay
memory retrieval
memory storage
memory trace
mental arithmetic
mental imagery
mental representation
mental rotation
metacognition
metacognitive skill
metacomprehension
metamemory
metaphor
misattribution
monitoring
mood
morphological processing
morphology
motion aftereffect
motor control
motor execution
motor inhibition
motor learning
motor planning
motor program
motor sequence learning
movement
multisensory
multisensory integration
multistable perception
naming
narrative
navigation
neologism
neuroplasticity
nociception
noesis
noise sensitivity
nondeclarative knowledge
nondeclarative memory
novelty detection
object categorization
object centered representation
object detection
object manipulation
object perception
object recognition
obsession
offensive (proactive) aggression
olfaction
olfactory perception
openness
optical illusion
orthographic lexicon
orthography
overt attention
pain
pain habituation
pain sensitization
paranoia
paraphasia
parsing
passive attention
past tense
pattern recognition
pavlovian conditioning
perception
perceptual binding
perceptual categorization
perceptual fluency
perceptual identification
perceptual learning
perceptual similarity
perceptual skill
perfectionism
performance monitoring
phonation
phonemic paraphasia
phonetics
phonological awareness
phonological buffer
phonological code
phonological encoding
phonological loop
phonological processing
phonological retrieval
phonological working memory
phototransduction
planning
pragmatic inference
pragmatic knowledge
pragmatic reasoning
preattentive processing
preconscious perception
prejudice
primary memory
priming
proactive interference
problem solving
procedural knowledge
procedural learning
procedural memory
procedural rule
processing capacity
processing stage
Production of non-facial communication
Productive facial communication
pronunciation
proper noun
proprioception
prosodic stress
prosody
prospective memory
prospective planning
prototype
psychological refractory period
psychosis
quantitative skill
rapid reacquisition
reading
reasoning
recall
reception of facial communication
Reception of non-facial communication
recognition
reconsolidation
regret
rehearsal
rehearsal loop
reinstatement
relational learning
remembering
remote memory
renewal
repressed memory
resource
resource limit
resource sharing
response inhibition
response selection
restricted behavior
retention
retrieval
retrieval cue
retroactive interference
reward
reward learning
reward valuation
rhythm
rigidity
risk
risk seeking
route knowledge
routine
rule
rule learning
sadness
salience
schema
search
selective attention
self monitoring
self-control
self-knowledge
self-talk
semantic category
semantic information
semantic knowledge
semantic memory
Semantic network
semantic processing
semantic working memory
sense of body ownership
sense of ownership
sensitivity to change
sensory defensiveness
sensory memory
sentence comprehension
sentence processing
sentence production
sequence learning
serial learning
serial processing
serial search
set shifting
shallow processing
shame
short term memory
skepticism
skill
skill acquisition
sleep
social cognition
social context
social intelligence
social motivation
social phobia
somatosensation
source memory
source monitoring
spatial ability
spatial attention
spatial cognition
spatial memory
spatial working memory
speech perception
speech processing
speech production
spontaneous recovery
spreading activation
stereopsis
stereotypes
strategy
Strength
stress
subconscious
sublexical route
subliminal perception
suicidal ideation
supervisory attentional system
surprise
sustained attention
synchrony perception
syntactic parsing
syntactic processing
syntax
tactile working memory
task set
task set reconfiguration
task switching
taste aversion
text comprehension
text processing
theory of mind
thermosensation
thought
top down processing
trait anxiety
transduction
traumatic memory
uncertainty
unconscious perception
unconscious process
understanding mental states
unisensory
updating
utility
valence
vection
verbal fluency
verbal memory
vestibular control
visual acuity
visual angle
visual attention
visual awareness
visual buffer
visual imagery
visual masking
visual memory
visual object recognition
visual orientation
visual perception
visual representation
visual search
visual working memory
visuospatial sketch pad
wisdom
word comprehension
word generation
word order
word pronunciation
word recognition
word repetition
working memory
working memory retrieval
working memory storage
worldview
memory encoding
associative memory
contextual learning
motor imagery
perceptual priming
conceptual priming
semantic priming
insight problem
creativity
inductive reasoning
