# Supplementary material for: Revealing Relationships Among Cognitive Functions Using Functional Connectivity and a Large-Scale Meta-Analysis Database
Source: Front Hum Neurosci. 2020 Jan 10;13:457. doi: 10.3389/fnhum.2019.00457 (PMC6965330; doi:10.3389/fnhum.2019.00457)
Supplement: Supplementary file 9 [file Table_9.XLSX]

## Sheet: Sorted_NormNmfBasis
Supplementary Table 9: Gini coefficients and the nonnegative matrix factorization (NMF) basis values for the cognitive functions. The table is sorted by the Gini coefficients.
Concept Name	Gini coef.	factor 1	factor 2	factor 3	factor 4	factor 5	factor 6
episodic memory	0.140205	0.00858649	8.24636e-17	0.0291138	9.35729e-17	0.0654591	0.342187
remembering	0.153748	0.0452324	8.24636e-17	0.0125016	9.35729e-17	0.0755779	0.264325
memory retrieval	0.163192	0.020918	8.24636e-17	0.00102678	0.131902	1.05227e-16	0.266204
thought	0.163354	0.0567933	8.24636e-17	0.00188273	9.35729e-17	0.137208	0.261829
associative memory	0.163422	0.0265727	0.0445566	0.0314248	9.35729e-17	0.062634	1.15266e-10
prospective memory	0.169827	0.00857326	8.24636e-17	8.99498e-17	0.163433	0.0907406	0.195473
social cognition	0.171279	0.0571461	8.24636e-17	3.41239e-05	9.35729e-17	0.061942	0.145418
default mode network	0.174847	0.118303	8.24636e-17	9.52029e-15	9.35729e-17	0.111659	0.30176
sleep	0.176899	2.5925e-13	0.0159064	8.99498e-17	0.0676122	0.130541	1.01037e-16
learning	0.177562	4.85034e-14	0.0172969	8.99498e-17	0.0721872	0.174025	1.01037e-16
autobiographical memory	0.177691	0.0998953	8.24636e-17	0.000136786	9.35729e-17	0.076739	0.277852
eating	0.179274	0.00900423	8.24636e-17	8.99498e-17	0.0344228	0.201526	1.01037e-16
memory	0.179896	0.12653	8.24636e-17	0.00672418	2.11797e-16	0.0356915	0.292548
risk	0.180871	0.0113108	8.24636e-17	8.99498e-17	0.0121056	0.225481	5.96647e-14
loss	0.181832	0.00618572	8.24636e-17	8.99498e-17	0.000747484	0.229497	8.97242e-13
strategy	0.182337	0.00102079	8.39175e-17	0.0621008	0.110373	1.05227e-16	0.11622
sequence learning	0.182938	7.80687e-17	0.0607327	3.14053e-14	0.0317765	0.125922	1.01037e-16
decision making	0.183755	0.115156	8.24636e-17	8.99498e-17	0.0562592	0.233421	3.97958e-11
semantic memory	0.184211	0.0999547	8.24636e-17	0.00221334	9.35729e-17	0.0212426	0.185541
choice	0.184917	0.0758453	8.24636e-17	8.99498e-17	0.0829102	0.255033	9.35844e-13
impulsivity	0.186218	0.0899528	8.24636e-17	8.99498e-17	1.32231e-16	0.199428	2.02326e-13
stress	0.187269	0.0170611	4.14693e-16	2.13774e-16	9.35729e-17	0.223679	2.72658e-13
retrieval	0.187357	0.153531	8.24636e-17	2.03588e-05	9.59336e-13	0.0503196	0.26431
anticipation	0.191046	4.78303e-09	0.0509853	8.99498e-17	0.0630582	0.270435	1.01037e-16
reward	0.193117	0.0436486	8.24636e-17	8.99498e-17	0.027049	0.320008	4.07873e-15
arousal	0.193443	0.0765101	1.00531e-12	8.99498e-17	9.35729e-17	0.261243	1.01037e-16
reasoning	0.196324	0.145795	8.24636e-17	2.6658e-10	0.149389	1.05227e-16	0.167769
fear	0.196372	0.0501511	1.39876e-11	9.23847e-17	9.35729e-17	0.263278	1.01037e-16
uncertainty	0.196833	0.091102	8.24636e-17	8.99498e-17	0.145234	0.0995043	0.114467
emotional expression	0.198662	0.0204988	0.0351373	0.0608582	9.35729e-17	0.0976562	1.01037e-16
planning	0.199091	0.0146906	0.000344603	0.029315	0.288228	1.05227e-16	0.0471505
response inhibition	0.199449	0.00294719	0.0193353	8.99498e-17	0.241355	0.141251	1.01037e-16
familiarity	0.2007	0.159953	8.24636e-17	1.89199e-08	9.35729e-17	0.0415033	0.25382
intelligence	0.201236	0.129047	8.24636e-17	8.99498e-17	0.122678	0.069872	0.0849207
anxiety	0.201454	0.0174861	0.0824206	8.99498e-17	9.35729e-17	0.140774	1.01037e-16
task switching	0.202903	0.0513715	8.47878e-07	0.0194326	0.215529	1.05227e-16	0.0296068
goal	0.204372	1.51361e-06	0.0163726	0.0575581	0.1953	1.05227e-16	0.031101
working memory	0.204856	0.00116981	0.0111233	0.0352915	0.289203	1.05227e-16	0.000667367
consolidation	0.206218	0.0285619	0.0340738	8.99498e-17	0.0497955	0.145361	1.01037e-16
response selection	0.207089	4.70203e-12	0.0371114	1.59154e-15	0.19754	0.0323957	5.93897e-09
cognitive control	0.208434	0.0292803	2.07886e-06	1.8344e-16	0.302626	0.0446572	1.58454e-16
intention	0.20882	0.201971	8.24636e-17	4.90369e-16	9.68128e-17	1.54314e-15	0.129827
theory of mind	0.209442	0.211217	8.24636e-17	3.02073e-13	9.35729e-17	1.98955e-14	0.152866
belief	0.210825	0.203966	8.24636e-17	8.99498e-17	5.84888e-16	9.87125e-14	0.177323
rule	0.211533	0.0214567	7.2001e-05	0.00803759	0.290897	1.05227e-16	0.00217097
executive control	0.212261	3.80695e-09	0.0209137	0.0466356	0.121291	0.0256688	1.01037e-16
mental rotation	0.212756	7.80687e-17	0.0488214	0.154203	0.071439	1.05227e-16	0.00578672
maintenance	0.213122	0.0133783	0.0284959	0.0394907	0.275883	1.05227e-16	0.000361334
navigation	0.213465	7.80687e-17	2.77571e-05	0.203814	9.35729e-17	0.00318838	0.123715
executive function	0.214276	7.80687e-17	0.0332297	0.0245687	0.103985	0.0125913	5.66713e-16
emotion	0.215168	0.189294	8.24636e-17	8.99498e-17	9.35729e-17	0.160009	1.08715e-16
expectancy	0.216174	0.0310623	0.0408055	8.99498e-17	0.22405	4.55195e-13	1.01037e-16
deception	0.216295	0.12908	8.24636e-17	8.99498e-17	0.19834	4.55561e-15	1.13304e-16
empathy	0.217677	0.0706628	0.105592	8.99498e-17	0.0667713	0.131989	1.01037e-16
narrative	0.217972	0.2452	8.24636e-17	2.04688e-11	9.35729e-17	1.05227e-16	0.113363
judgment	0.218842	0.227425	8.24636e-17	1.21078e-08	1.10569e-13	1.05227e-16	0.136664
pain	0.219419	4.89017e-10	0.191338	8.99498e-17	0.0835808	0.163338	1.01037e-16
emotion regulation	0.219771	0.106427	3.18288e-13	8.99498e-17	0.123556	0.152595	1.01037e-16
sustained attention	0.220057	0.0200911	0.0381676	8.99498e-17	0.0221197	0.0378933	0.0038108
decision	0.220771	0.11562	8.24636e-17	8.99498e-17	0.210047	3.98331e-13	1.45612e-16
habit	0.223132	0.00446828	0.0800208	8.99498e-17	9.35729e-17	0.0955117	1.01037e-16
recall	0.223985	0.172565	9.25383e-12	7.0053e-07	9.35729e-17	6.03956e-12	1.26365e-13
attention	0.223999	2.38715e-09	0.00595364	0.242358	0.0714072	1.05227e-16	1.69476e-16
inference	0.224851	0.204232	8.24636e-17	8.99498e-17	9.35729e-17	1.30881e-15	1.57415e-16
phonological processing	0.225794	0.116286	0.0173557	0.0114494	0.148374	1.05227e-16	1.01037e-16
motor learning	0.228234	2.50189e-16	0.165806	3.75399e-13	9.35729e-17	0.0340351	8.69263e-09
humor	0.2288	0.14848	3.99518e-09	2.73606e-09	9.35729e-17	1.05227e-16	1.23268e-13
context	0.229349	0.128726	8.24636e-17	8.99498e-17	0.159216	2.29935e-16	1.01037e-16
extinction	0.230693	0.00576642	3.24009e-14	0.0591555	9.35729e-17	0.0466588	8.12884e-13
concept	0.232515	0.243584	8.24636e-17	0.00416567	1.7172e-16	1.05227e-16	2.10423e-15
semantic processing	0.235283	0.19058	2.77035e-14	0.0205446	2.62498e-12	1.05227e-16	2.09449e-16
facial expression	0.235648	0.0148939	0.106494	0.0722672	9.35729e-17	0.053092	1.01037e-16
spatial working memory	0.235912	7.80687e-17	0.135439	0.123044	0.0327416	1.05227e-16	0.00287089
action	0.237448	5.00549e-07	0.19556	0.11427	0.0691132	1.05227e-16	1.36708e-09
memory encoding	0.239412	0.0561235	0.0028929	0.130448	2.17326e-11	1.05227e-16	1.01037e-16
comprehension	0.240324	0.247799	5.40144e-10	8.99498e-17	9.35729e-17	1.05227e-16	1.01037e-16
sentence comprehension	0.240924	0.169126	0.0317415	1.02605e-14	7.17023e-12	1.05227e-16	1.01037e-16
meaning	0.241024	0.189708	4.05258e-10	1.53116e-13	0.0721323	1.05227e-16	1.01037e-16
short term memory	0.242113	0.0473604	0.0173317	0.127999	7.94611e-15	1.05227e-16	1.01037e-16
metaphor	0.24464	0.221261	3.88802e-06	8.58156e-16	1.08462e-11	1.05227e-16	1.01037e-16
language processing	0.248957	0.185243	0.0599985	8.99498e-17	9.35729e-17	1.05227e-16	1.01037e-16
language	0.249903	0.117027	0.0594743	0.0683819	7.09257e-12	1.05227e-16	1.01037e-16
communication	0.250862	0.0584467	0.136719	8.99498e-17	9.35729e-17	1.05227e-16	1.01037e-16
motor control	0.252463	7.80687e-17	0.245393	8.99498e-17	7.07688e-16	0.0414139	1.47766e-10
visual attention	0.256481	1.20479e-13	0.0534298	0.183219	9.35729e-17	0.000272519	0.0842132
syntax	0.256605	0.0761853	0.134962	8.99498e-17	9.35729e-17	1.05227e-16	1.01037e-16
listening	0.257326	0.0901247	0.20663	8.99498e-17	9.35729e-17	1.05227e-16	1.01037e-16
prosody	0.257326	0.0567131	0.213274	8.99498e-17	9.35729e-17	6.95465e-16	1.01037e-16
induction	0.257476	6.40032e-15	0.0750987	1.38293e-05	4.91701e-11	2.84158e-06	0.000936266
consciousness	0.258404	0.00162499	0.000574971	0.112006	3.06062e-14	0.000692929	1.00877e-14
rehearsal	0.25965	0.0540868	0.117878	8.99498e-17	8.0266e-15	1.05227e-16	1.01037e-16
integration	0.260765	0.0479414	0.225789	8.99498e-17	9.35729e-17	1.05227e-16	1.01037e-16
melody	0.262964	0.00379173	0.234826	8.99498e-17	9.35729e-17	0.0241676	3.24085e-10
speech production	0.264068	0.0150316	0.301579	8.99498e-17	9.35729e-17	1.00248e-13	1.01037e-16
reading	0.264536	0.0578812	0.0315044	0.201246	6.05076e-14	1.05227e-16	1.01037e-16
speech perception	0.265372	0.0271024	0.25573	8.99498e-17	9.35729e-17	1.05227e-16	1.01037e-16
movement	0.269377	1.70815e-14	0.329116	3.05885e-11	2.02174e-15	7.55047e-06	0.000890452
visual search	0.271943	7.80687e-17	0.0139337	0.328689	1.51244e-16	3.53134e-08	1.01037e-16
motor imagery	0.273698	5.07836e-16	0.313845	1.00572e-13	9.35729e-17	7.18918e-13	0.00133014
skill	0.274055	9.50943e-07	0.283497	8.56223e-14	2.0624e-15	1.05227e-16	0.000442903
object recognition	0.274537	1.82527e-05	0.0301853	0.251941	9.35729e-17	1.34057e-14	1.01037e-16
retention	0.274962	1.48145e-14	0.188768	7.848e-16	9.35729e-17	1.05227e-16	0.00436017
gaze	0.275081	3.86389e-08	0.090728	0.241182	9.35729e-17	1.05227e-16	1.01037e-16
face perception	0.278447	0.00592026	0.0153908	0.223337	9.35729e-17	1.0568e-07	1.01037e-16
mental imagery	0.279465	2.39759e-15	1.80629e-08	0.342072	9.35729e-17	0.00161549	4.77339e-15
naming	0.279483	0.0233778	0.0984553	0.197418	9.35729e-17	1.05227e-16	1.01037e-16
spatial attention	0.281007	2.30926e-12	0.01891	0.332511	9.35729e-17	2.10377e-09	1.01037e-16
selective attention	0.286076	6.66914e-15	0.00223399	0.217877	9.35729e-17	0.000395381	1.01037e-16
search	0.287581	7.22958e-10	6.46373e-09	0.316825	9.35729e-17	0.00367714	1.01037e-16
